# Supplementary material
Source: publisher site journal article supplement (https://www.kjim.org/upload/media/kjim-2018-223-suppl.pdf)
Supplement: Supplementary file 1 [file kjim-2018-223-suppl.pdf]

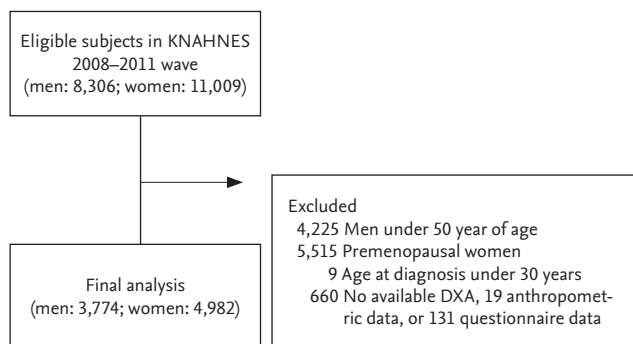

**Supplementary Figure 1.** Flow diagram of study subjects. KNAHNES, Korean National Health and Nutrition Examination Survey. DXA, dual-energy, X-ray absorptiometry.
